# Supplementary material
Source: publisher figshare collection journal article supplement (https://plos.figshare.com/articles/dataset/_/5689141)
Supplement: Supplementary file 1 [file 1 › S1 Dataset.xlsx]

## Sheet: 1a Survival
Days	WT	Ncf1-/-
28	0
28	0
28	0
28	0
28	0
28	0
28	0
28	0
28	0
28	0
28	0
28	0
28		0
28		0
26		1
26		1
15		1
15		1
14	0
14	0
14	0
14		1
14		0
14		0
14		0
14		0
14		0
14		0
14		0
14		0
14		0
12		1
12		1
12		1
12		1
11		1
10		1
9		1
7	0
7	0
7	0
7	0
7	0

## Sheet: 1b BWL%
BWL(%) compared with Day0 BW
	WT													Ncf1 -/-
Day0	0	0	0	0	0	0	0	0	0	0	0	0	0	0	0	0	0	0	0	0	0	0	0	0	0	0
Day1	-8.8	2.6	2.6	-7.7	-7.5	-0.4	-8.1	-2.2	-7.4	-3.3	-3.6	-2.3	-4.4	-0.5	-2.2	3.1	-1.4	-1.2	-1.7	-2.2	-5.3	-2.8	-4.2	-4.9	-3.7	-6.5
Day2	-7.7	-0.9	-1.3	-5.6	-12.3	3.7	-4.5	0	-1.2	-0.8				0	-1.7	0	-9	-2.1	-6.5	-2.2
Day3	-8.8	-1.3	-1.8	-0.4	-10.1	3.7	-1.8	1.3	-0.8	-0.8	-9.5	-2.3	-4.4	1.6	-1.1	-0.5	-9.4	-3.3	-6	-0.4	-20	-16.7	-17.7	-17.2	-17.4	-17
Day5	-7.7	0.9	5.3	0.4	-3.9	4.2	-0.9	-0.9	-1.2	1.2	-10.9	2.8	-0.9	3.2	-1.1	-5.7	-19.8	-2.1	-12.5	-2.2	-20.9	-15.7	-21.1	-16.4	-20.7	-17.4
Day6	-3.8	0.4	5.7	1.3	-3.9	2.9	2.7	4	1.2	3.3	-14.5	0.9	-2.7	4.3	-1.7	-9.3	-20.3	-5.8	-12.9	-1.3	-21.3	-19	-24.5	-17.6	-21.2	-21.1
Day7	-4.2	1.8	3.9	0.9	-3.9	4.2	3.2	2.7	0.4	1.6	-14.9	0	-1.8	0	-8.8	-13.5	-23.6	-11.2	-18.5	-8.5	-23.6	-21.3	-27	-20.9	-25.7	-23.5
Day8	-5	-0.9	6.1	1.3	-0.9	4.2	3.2	-0.9	1.6	1.2				-1.1	-12.7	-15	-25	-12.8	-19.8	-9.4
Day9	-5.7	1.8	6.1	0.9	-1.3	2.5	1.4	0.9	1.6	2.5	-10.9	1.4	1.8	-3.7	-12.7	-17.6	-29.2	-16.1	-22.8	-11.6	-29.9	-26.4		-26.6	-33.2	-27.5
Day10	-5	1.8	7	0.4	-0.9	3.3	2.7	2.7	1.6	2.9				-3.2	-13.8	-20.7		-15.3	-25	-11.6
Day11	-5	1.3	7.5	0.9	1.8	5	3.2	2.7	2.5	0.8				-4.3	-15.5	-21.2		-16.1	-28	-10.3
Day12	-3.8	2.6	6.6	0.9	1.3	6.3	5	5.8	2.9	3.3	-8.6	2.3	4.9	-2.7	-16	-23.3		-16.5		-11.2
Day13	-3.1	-0.4	7.9	2.1	-0.4	5.4	5	6.7	1.6	4.1				-4.3	-14.9			-17.8		-10.7
Day14	-3.4	1.3	7	3	-0.4	5.8	5.4	6.3	1.2	4.5	-5	3.2	4.9	-3.2	-16			-18.2		-12.9
Day15	-2.3	1.3	9.2	2.1	-0.4	5.8	4.5	6.3	2.9	4.5				-4.3	-18.2			-18.2		-13.8
Day16	-2.7	2.6	8.3	3.4	-0.9	8.8	5	8	2.9	5.3				-3.7	-19.9			-19		-13.4
Day19	-0.8	4	8.8	3.4	0	5.4	5	11.6	4.9	9				-3.7	-25.4			-23.1		-12.1
Day20	1.5	3.1	10.1	5.6	0	8.8	6.3	12.5	7.4	9.4				-0.5	-23.8			-23.6		-9.8
Day21	-0.4	3.5	8.3	2.6	0.4	6.3	4.5	11.6	4.1	8.2				-2.7	-31.5			-24		-10.3
Day22	2.3	7.5	13.2	7.7	3.5	10	6.8	12.1	7.4	11.1				-0.5	-29.3			-24		-9.8
Day23	4.2	7	13.6	3.9	0.9	10.8	5.9	12.9	7	12.7				0	-27.1			-24.8		-8
Day26	7.3	9.3	13.6	6	3.1	12.5	9	13.8	6.1	8.6				1.6	-31.5			-26.9		-6.7
Day28	6.1	7	11	4.7	3.1	9.6	7.2	13.8	5.7	10.2				3.2	-30			-31.8

## Sheet: 1c CFU
	WT					Ncf1-/-
Day7	940000	210400	26600	634000	309400	33000000	31360000	171840000	93480000	95430000
Day14	7200	247.5	1665	7200	12038	27600	451200	18240000	59290000	25200000	293550000

## Sheet: 1d Correlation
CFU	BWL
6	18.5
6	10.5
5	6.9
7	24.1
7	26.3
8	39.4
4	1.47
3	6.63
0	0
4	1.42
4	12.5
5	10.1
6	28.5
8	23.3
8	31.2
5	6.9
5	1.43
4	7.1
7	30.3
9	29.3

## Sheet: 3c counts
		WT				Ncf1-/-
Neutrophil	Day 7	40351	47991	27351	27000	1675651	2075651	1215651	1802030
	Day 14	411505	781505	101505	250955	4970525	5770525	4470525	4570301
Macrophages	Day 7	30209	45909	24009	36000	737400	797400	747400	742012
	Day 14	136416	586416	46416	220000	4385305	4985305	3985305	4358921

## Sheet: Fig 4 cytokines
		WT										Ncf1 -/-
IL-1β	Day 7	12800	12750	15400	16600	17350	6200	20750	12150	12750	12480	82250	79150	20850
	Day 14	25400	38100	36850	7150	8100	19000	16100	31350	40200	19750	114800	29650	35650	33635
		WT										Ncf1 -/-
TNF-α	Day 7	1300	1700	1550	1650	250	1750	1100				2750	6400	700	2050
	Day 14	1650	1300	50	200	2650	2250					8000	3900	3600
		WT										Ncf1 -/-
IL-6	Day 7	800	1150	800	1000	500	1500	100	1300	150	100	2750	6400	700	2050
	Day 14	2800	1500	1300	400	1900	800					7950	3600	2400
		WT										Ncf1 -/-
IFN-γ	Day 7	650	1450	1200	300	50	950	1300				2750	100	4000
	Day 14	1700	3650	5450	4400	11550	12950	4900	1550			11250	6150	4650
		WT										Ncf1 -/-
IL-10	Day 7	3210	3060	3040	3640	2890	3260	2610	3320	2890	3380	2530	3660	2780	2830	1672
	Day 14	3520	3050	3930	3400	2350	3610	2960	1816.5	2210		2370	3600	2630	2980	2410
		WT										Ncf1 -/-
IL-17A	Day 7	12198	15866	15497	15290	14565	14390	10596	13782	15087	10117	13147.6	22637.7	12540.1	14884.6
	Day 14	15812	13067	12126	12846	12531	13373	16104	10119	12492	13022	12158	12968	13238	15427
		WT										Ncf1 -/-
CXCL5	Day 7	7250	13800	8450	6250	8350	3450	3750	8700	6400	4200	17600	26300	8950	20450	5040
	Day 14	50100	39700	34600	3050	3400	33000	38950	27100	14500	13860	61900	47300	50350	61300	26970	63900
		WT										Ncf1 -/-
CCL5	Day 7	3450	3750	8700	6400	4200	7250	13800	8450	6250	8350	20450	26300	17600	5040	8950
	Day 14	33000	38950	27100	14500	13860	50100	39700	34600	3050	3400	63900	47300	50350	61900	61300	26970
		WT										Ncf1 -/-
CXCL1	Day 7	150	150	130	90	100	70	50	120	100	105	550	650	140	380
	Day 14	180	150	230	60	60	240	120	160	170	126	900	360	340	480	730	279

## Sheet: 5a IL1b
IL-1β (pg/Ml)
	6hr		12hr		18hr		24hr
Macrophages	WT	Ncf1-/-	WT	Ncf1-/-	WT	Ncf1-/-	WT	Ncf1-/-
	28.36	6.53	33.73	6.48	39.55	23.46	80.09	33.96
	25.39	5.46	25.27	6.15	65.88	20.1	69.79	28.17
	26.5	5.21	23.1	5.97	57.64	30.43	82.4	19.35

## Sheet: 5b IL1b
IL-1β (pg/Ml)
	2hr		4hr		6hr		12hr
Neutrophils	WT	Ncf1-/-	WT	Ncf1-/-	WT	Ncf1-/-	WT	Ncf1-/-
	58	61	74	93	80	182	107	230
	52	57	62	97	75	162	109	225
	46	39	65	118	76	179	99	217

## Sheet: 5d  NE
NE activity
PMA-control	PMA-control + NE inhibitor	M. marinum	M. marinum + NE inhibitor
1006	106	476	102
898	105	581	103
900	102	515	108
		535

## Sheet: 7d Areas
Infiltrated area
		Control					IL-1 depletion
	WT	53.4	51.2	54	51.5	48	48	42.2	38.5	42.1
	Ncf1-/-	69.9	68.4	67.9	60.2	57.3	40.6	42.6	50.1	45.3	54.8
		Control					IL-1 receptor antagonist (Anakinra)
	WT	54	51.2	54	56	46	48	46	38.5	42.1	52
	Ncf1-/-	78	72	72	62	60	65	54	50	49	49

[truncated: 1 more sheets: S1]
