# Supplementary material
Source: publisher figshare collection journal article supplement (https://plos.figshare.com/articles/dataset/_/5689141)
Supplement: Supplementary file 1 [file 1 › S1 Fig.pdf]

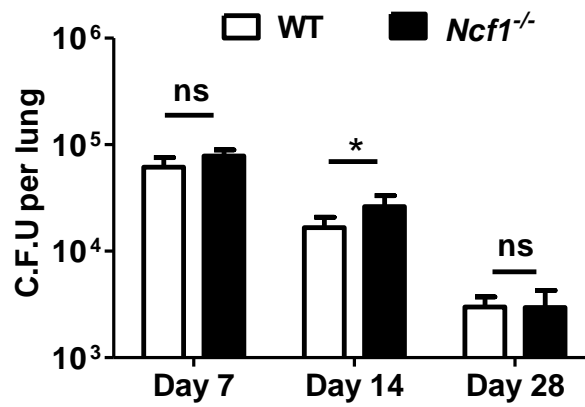

**S1 Fig Low-dose mycobacterial infection led to similar bacterial loads in *Ncf1*<sup>-/-</sup> and WT mice.**

*Ncf1*<sup>-/-</sup> and WT controls were intra-tracheal injected with *M. marinum* (3 × 10<sup>6</sup> CFU). The number of viable mycobacteria was determined at 7 days, 14 days and 28 days after *M. marinum* infection.

Data are shown as a mean log of CFU per paired-lung (5 mice per group).
